# Supplementary material for: The mechanistic link between health and gut microbiota diversity
Source: PubMed Central journal article supplement (PMC5794854; doi:10.1038/s41598-018-20141-6), 2018-02-01
Supplement: 41598_2018_20141_MOESM1_ESM.pdf [file 41598_2018_20141_MOESM1_ESM.pdf]

# **The mechanistic link between health and gut microbiota diversity**

**Olaf F.A. Larsen\* & Eric Claassen**

Vrije Universiteit Amsterdam, Athena Institute, De Boelelaan 1085, 1081 HV  
Amsterdam, The Netherlands

\* Corresponding author

## SUPPLEMENTARY INFORMATION

**Simulations.** All simulations were performed using R statistical software (version 3.4.0) within an RStudio environment (Version 1.0.143). Simulations were executed on a HP Z640 workstation containing an Intel(R) Xeon(R) CPU E5-2620 v4 @ 2.10GHz, with 64GB RAM. Simulations were partly performed in parallel (multicore).
